# Supplementary material for: HIF-2α is essential for carotid body development and function
Source: eLife journal article supplement (doi:10.7554/elife.34681), 2018-04-19
Supplement: supp [file elife-34681-supp-v1.zip]

Archive with 9 entries (9 files):
- elife_poa_e34681_Figure_3_figure_supplement_2.pdf
- elife_poa_e34681_Figure_4_figure_supplement_2.pdf
- elife_poa_e34681_Figure_1_figure_supplement_1.pdf
- elife_poa_e34681_Figure_7_figure_supplement_1.pdf
- elife_poa_e34681_Figure_5_figure_supplement_1.pdf
- elife_poa_e34681_Figure_6_figure_supplement_1.pdf
- elife_poa_e34681_Figure_3_figure_supplement_1.pdf
- elife_poa_e34681_Figure_4_figure_supplement_1.pdf
- elife_poa_e34681_Transparent_Reporting_File.pdf
