# Supplementary figures and images for: HIF-2α is essential for carotid body development and function
Source: eLife journal article supplement (doi:10.7554/elife.34681), 2018-04-19

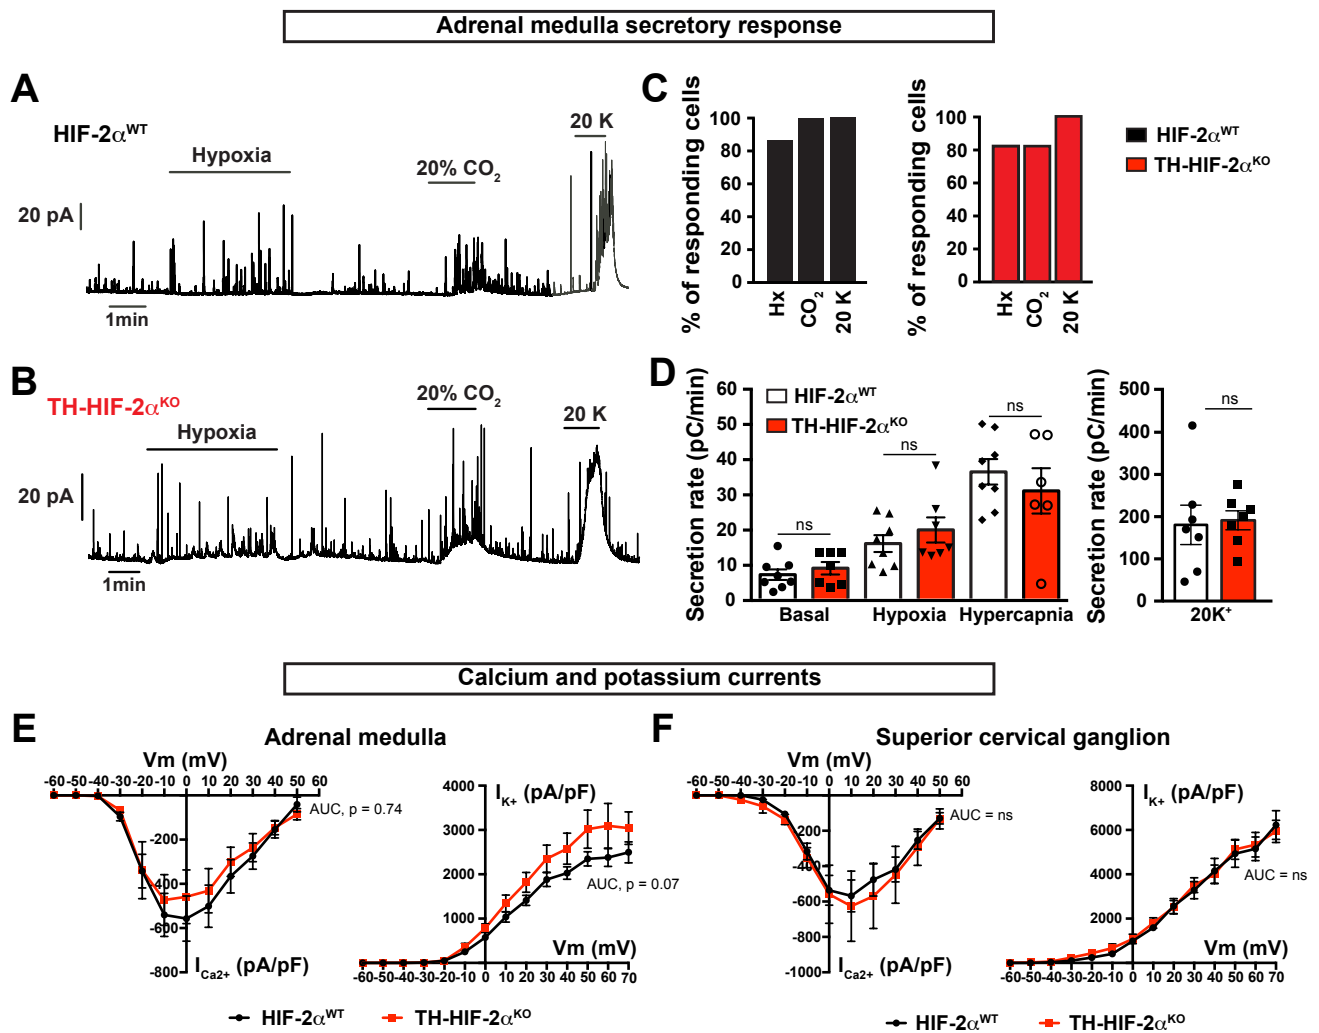

Supplement: supp [file elife-34681-supp-v1.zip › elife_poa_e34681_Figure_3_figure_supplement_2.pdf]

Macias\_Figure 4-figure supplement 2

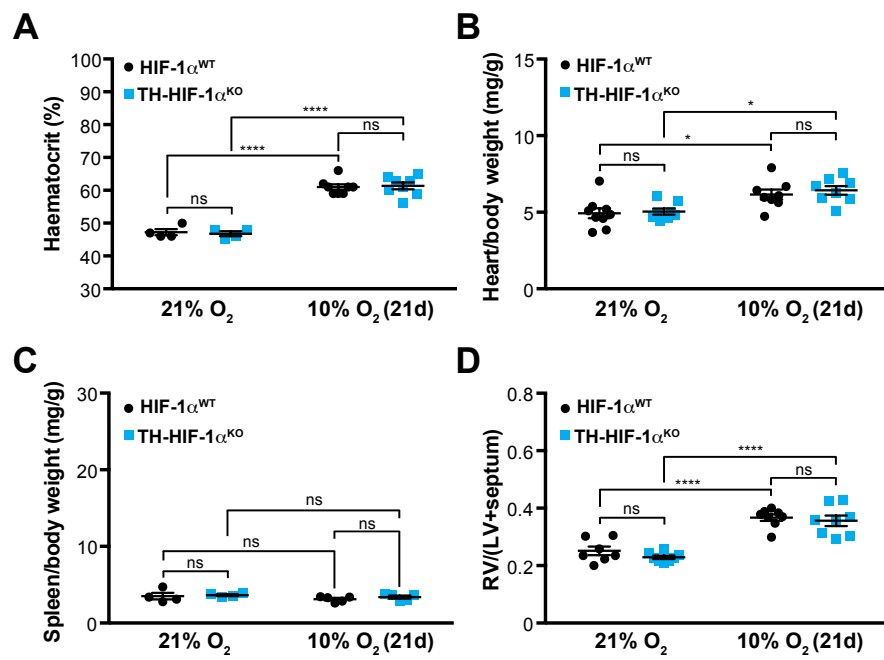

Supplement: supp [file elife-34681-supp-v1.zip › elife_poa_e34681_Figure_4_figure_supplement_2.pdf]

# Macias\_Fig1-figure supplement 1

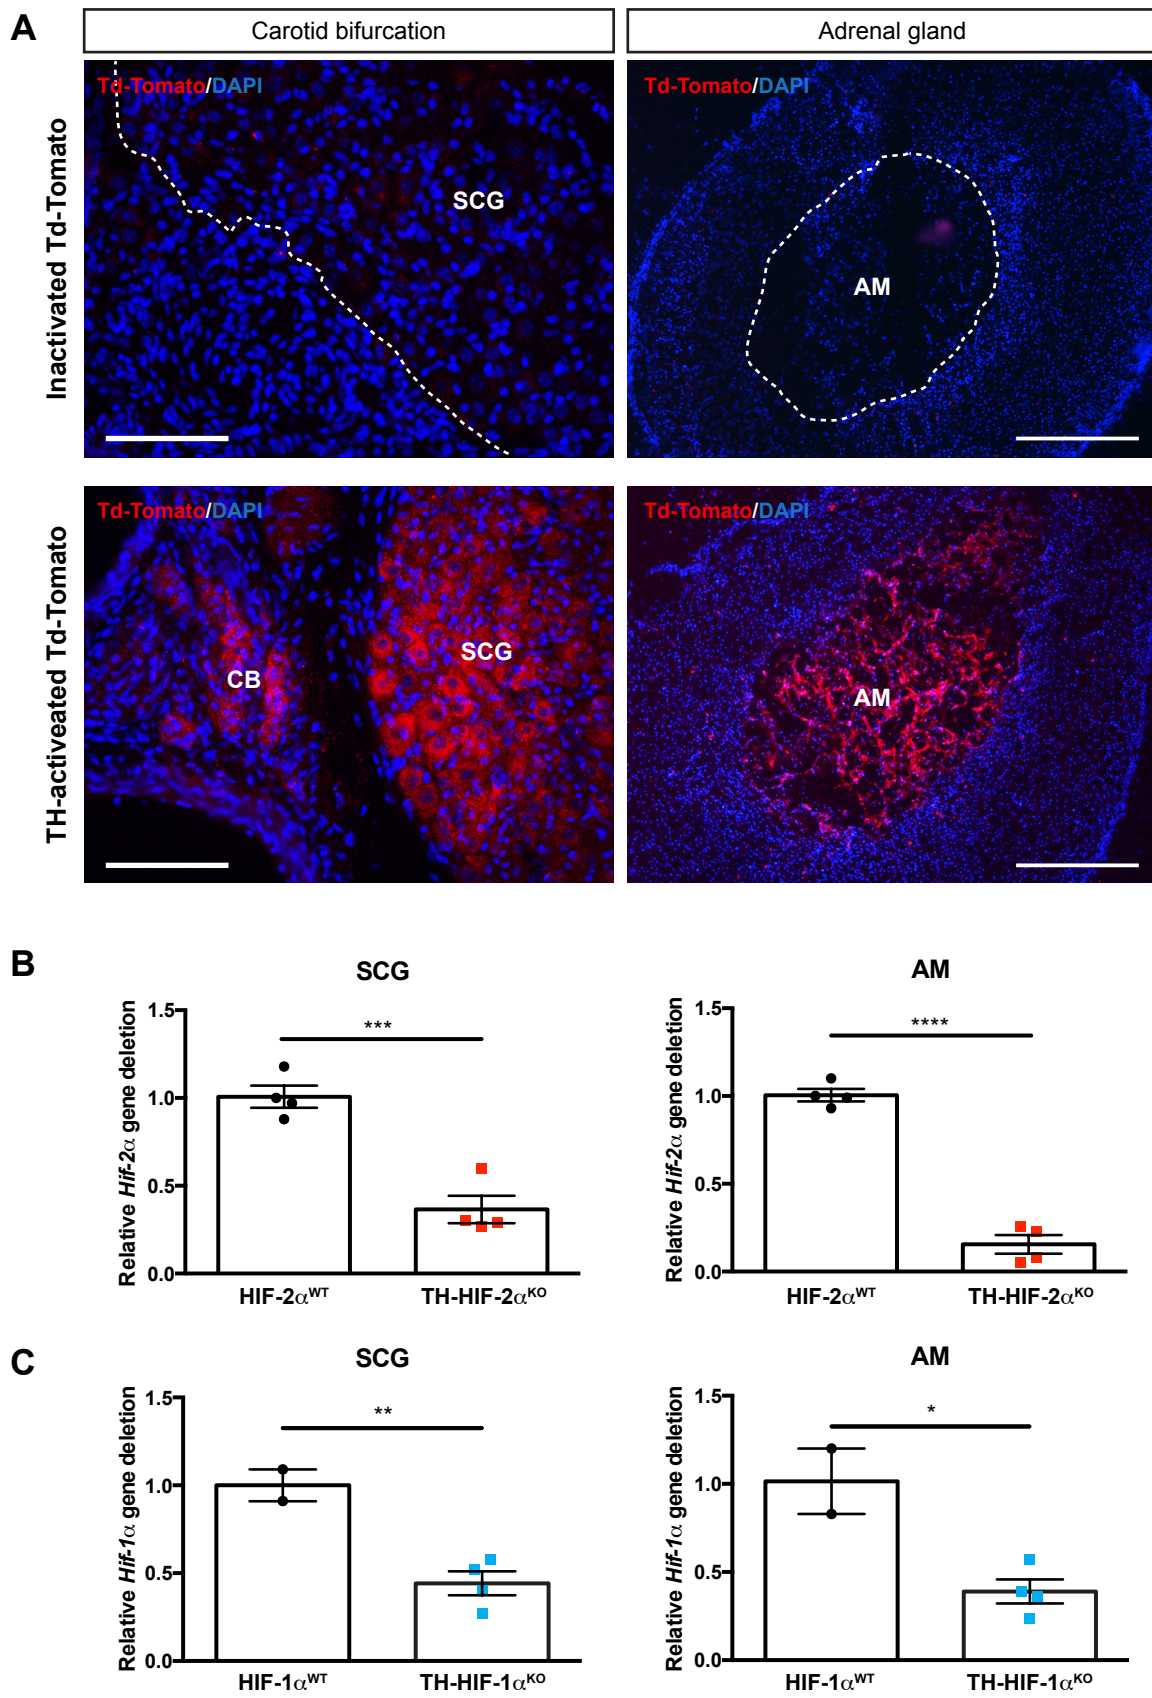

Supplement: supp [file elife-34681-supp-v1.zip › elife_poa_e34681_Figure_1_figure_supplement_1.pdf]

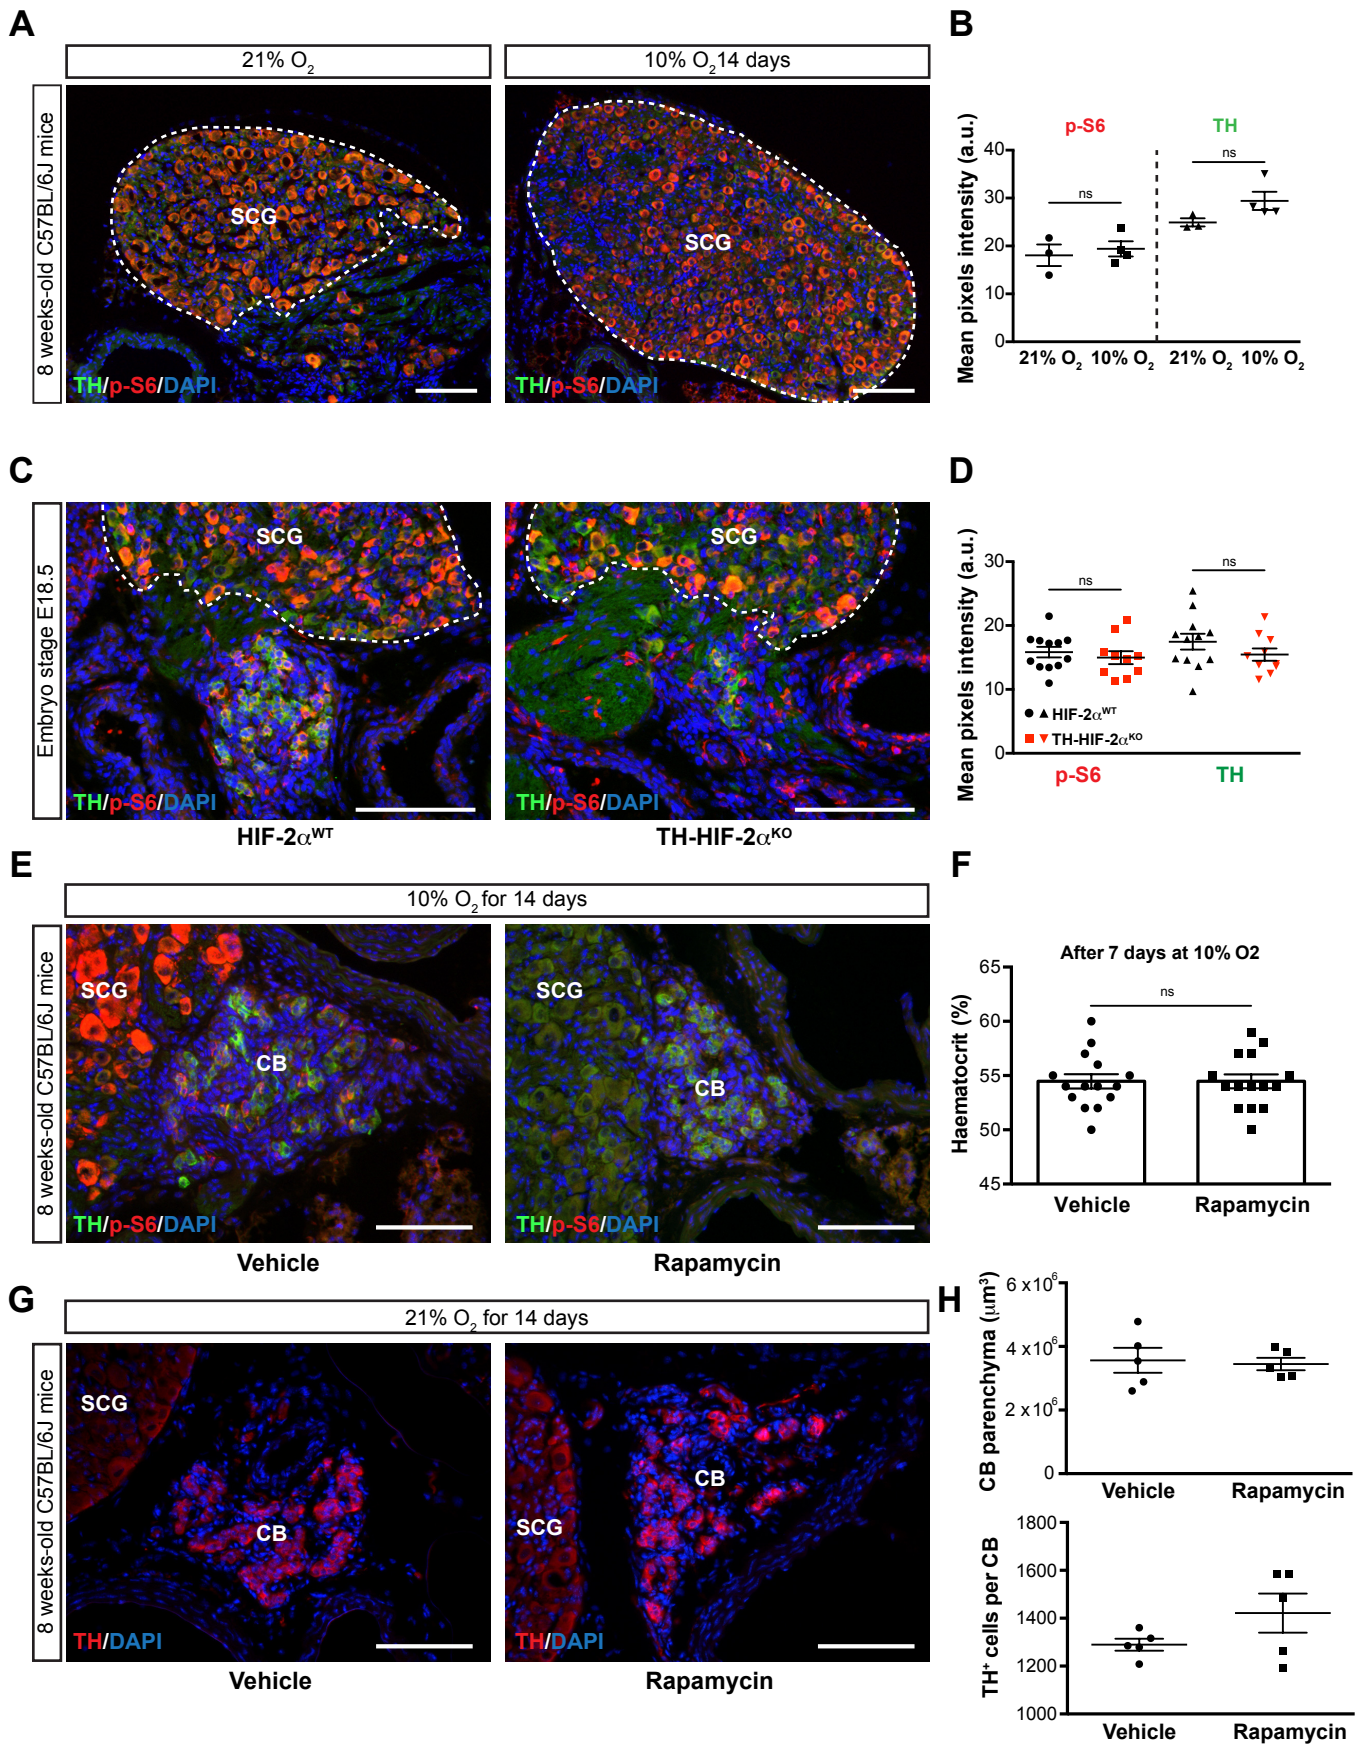

Supplement: supp [file elife-34681-supp-v1.zip › elife_poa_e34681_Figure_7_figure_supplement_1.pdf]

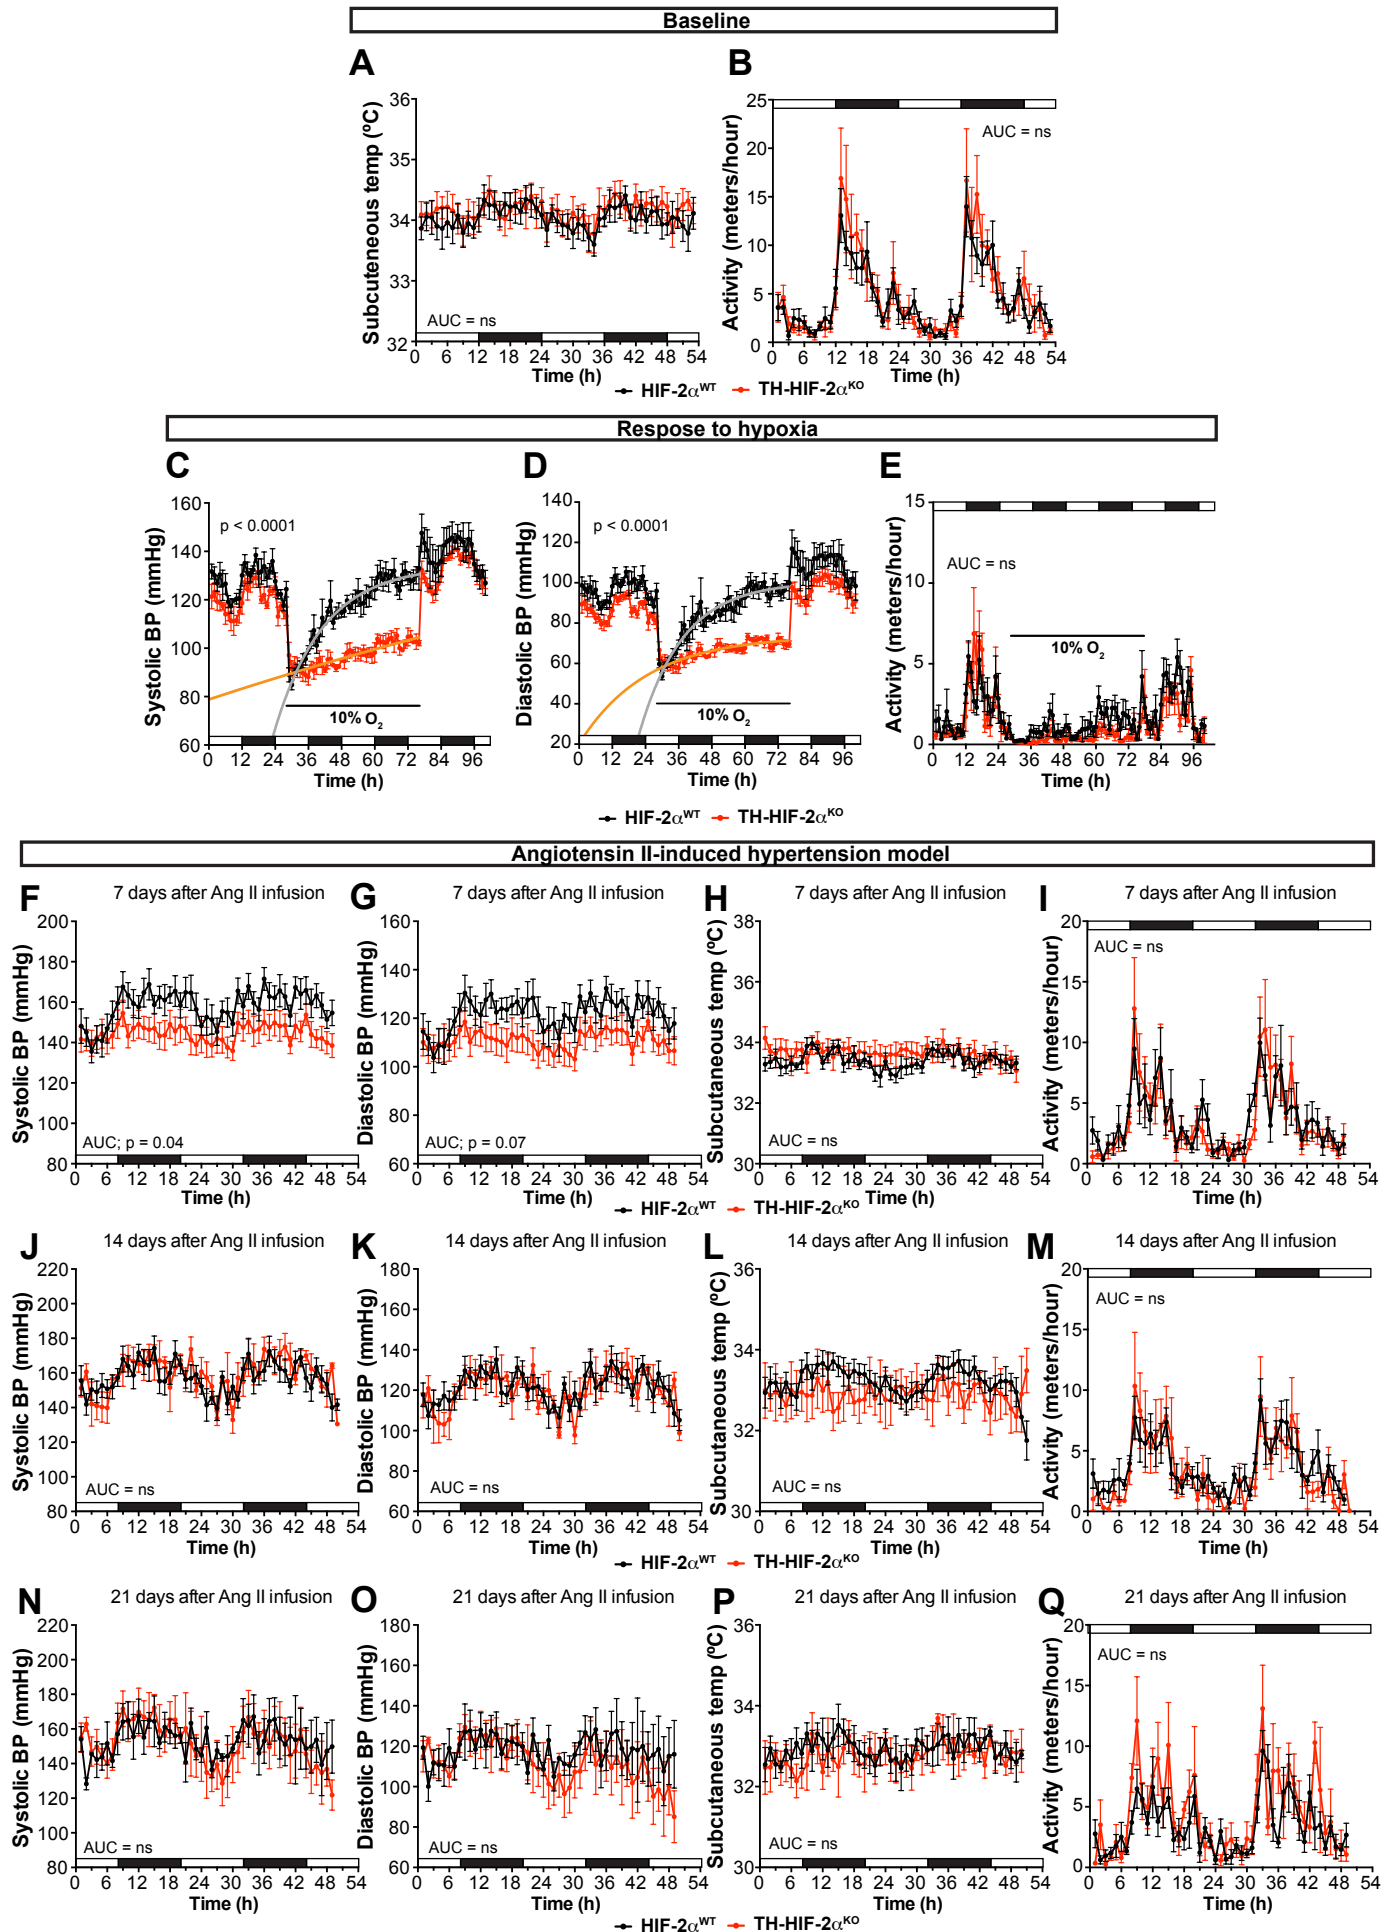

Supplement: supp [file elife-34681-supp-v1.zip › elife_poa_e34681_Figure_5_figure_supplement_1.pdf]

Macias\_Figure 6-figure supplement 1

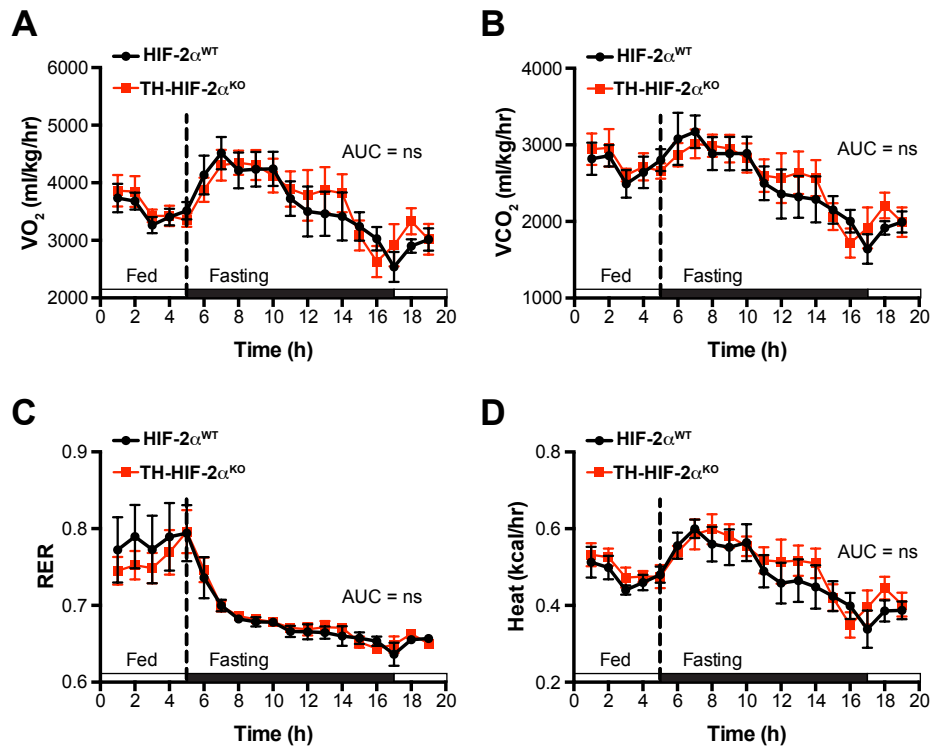

Supplement: supp [file elife-34681-supp-v1.zip › elife_poa_e34681_Figure_6_figure_supplement_1.pdf]

Macias\_Figure 3-figure supplement 1

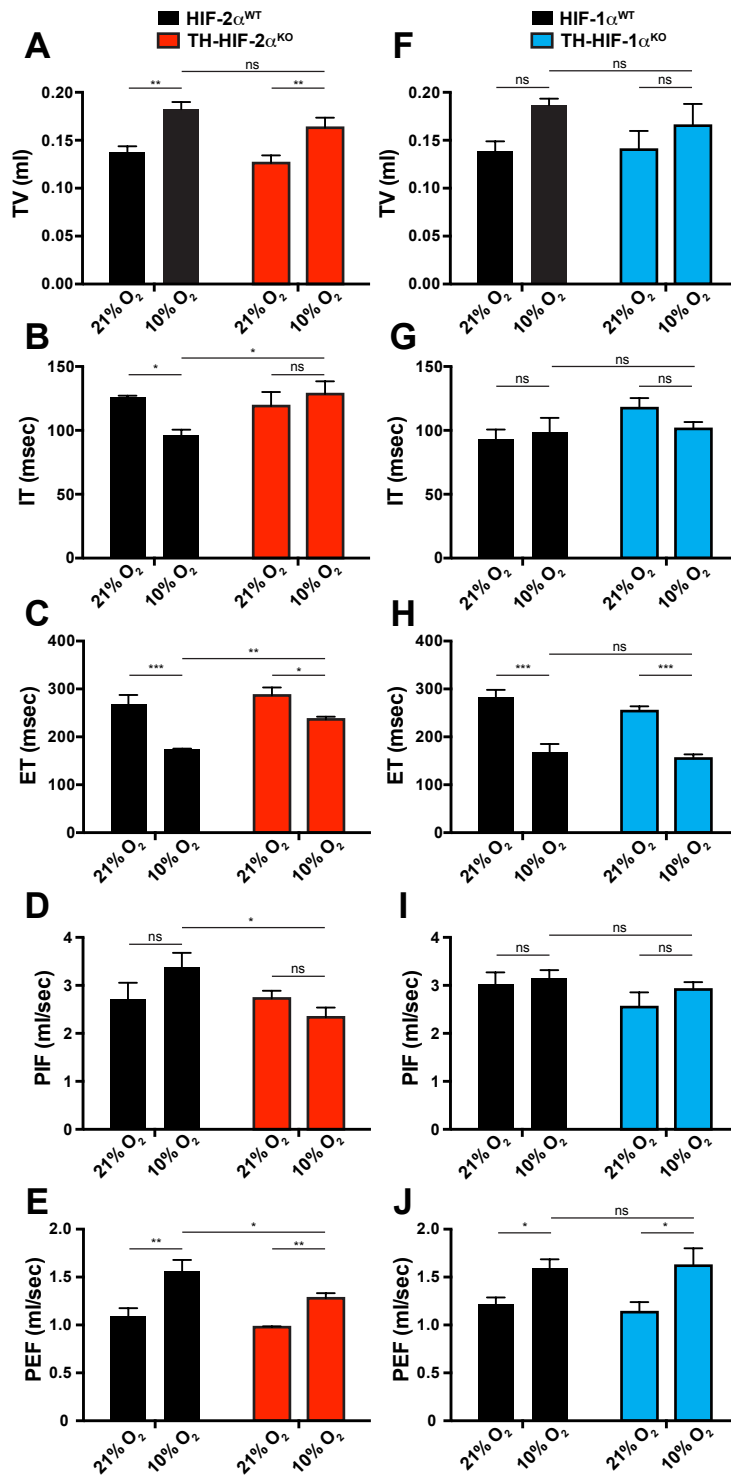

Supplement: supp [file elife-34681-supp-v1.zip › elife_poa_e34681_Figure_3_figure_supplement_1.pdf]

**A**

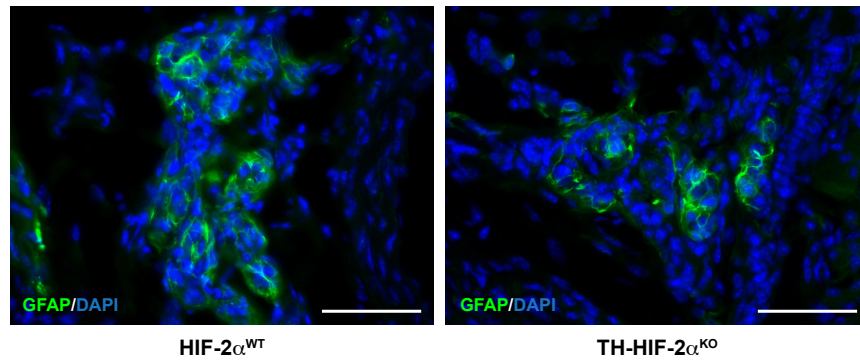

**B**

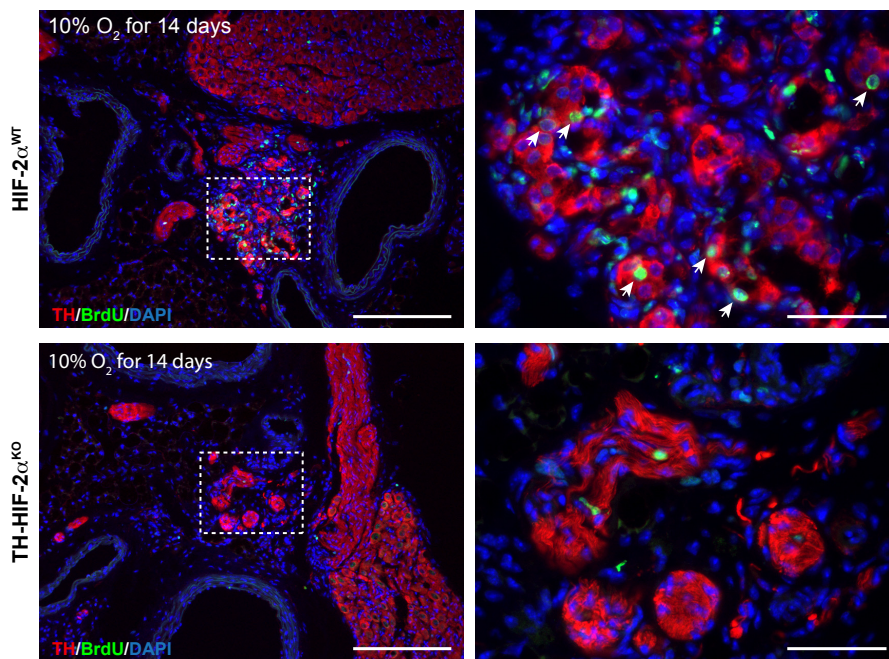

**C**

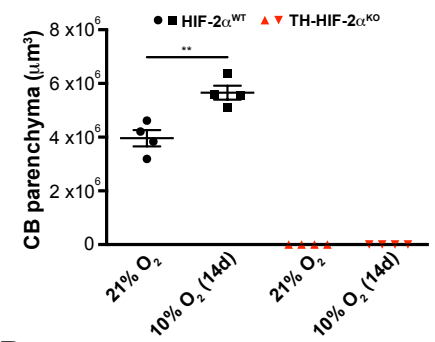

**D**

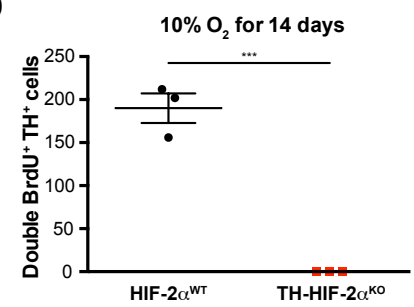

**E**

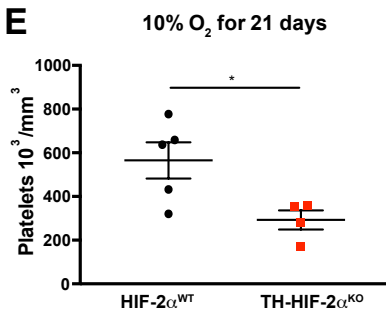

**F**

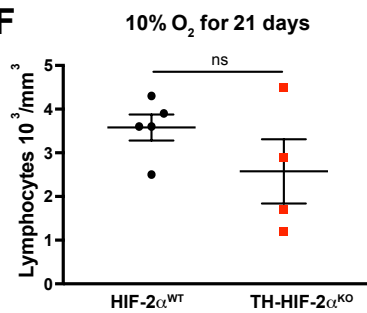

**G**

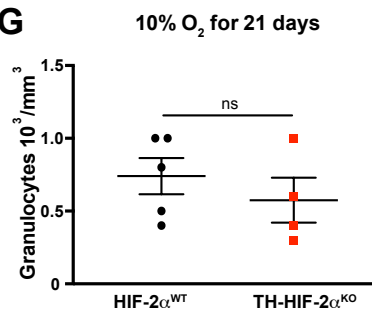

**H**

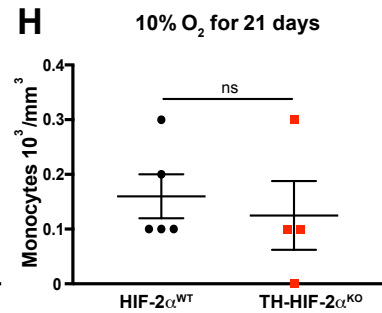

Supplement: supp [file elife-34681-supp-v1.zip › elife_poa_e34681_Figure_4_figure_supplement_1.pdf]
